# Supplementary material
Source: PubMed Central journal article supplement (PMC3811343)
Supplement: AEM.01953-13_zam999104756so1.pdf [file AEM.01953-13_zam999104756so1.pdf]

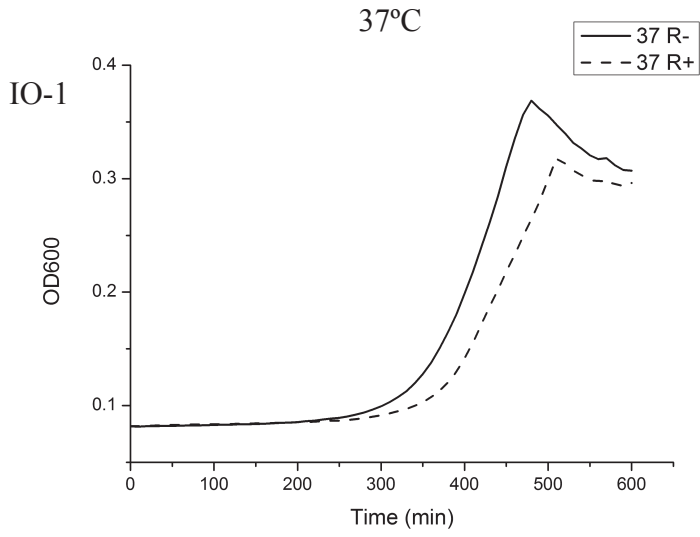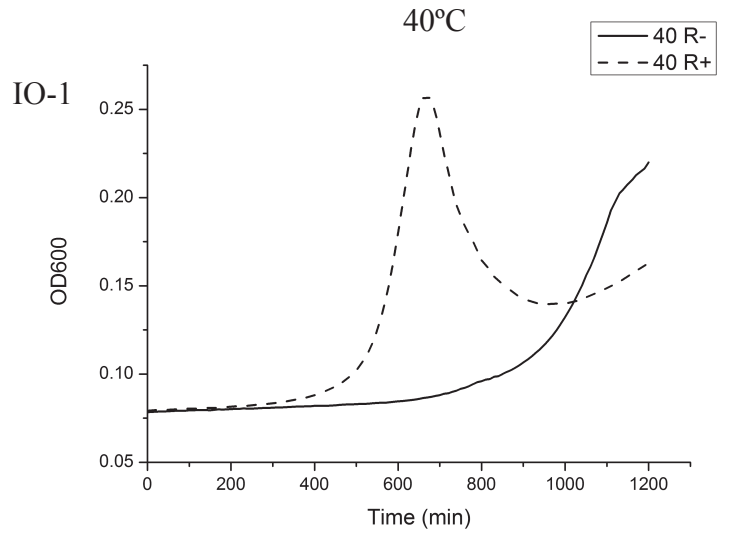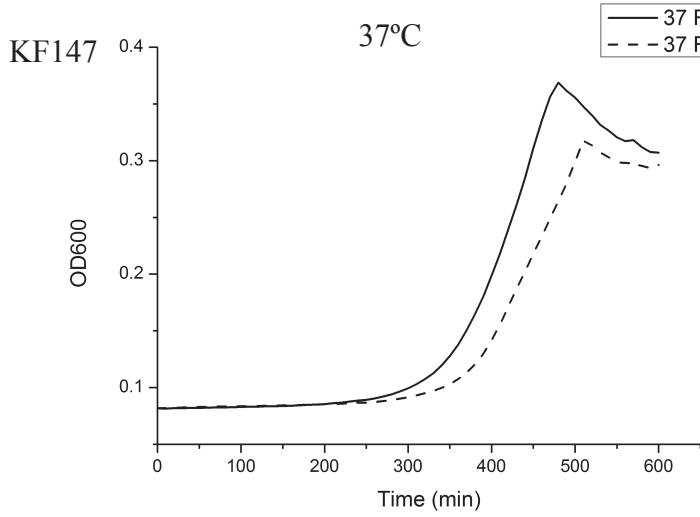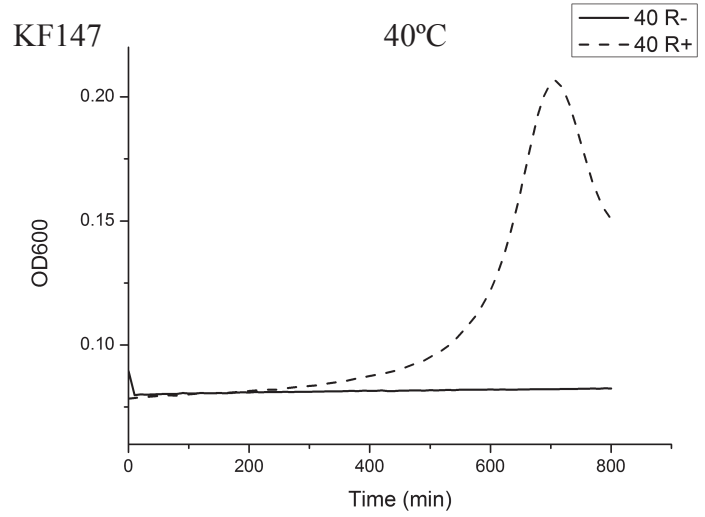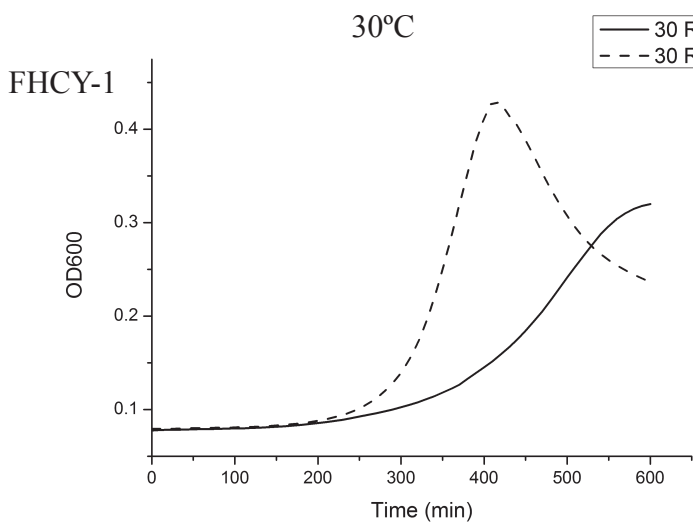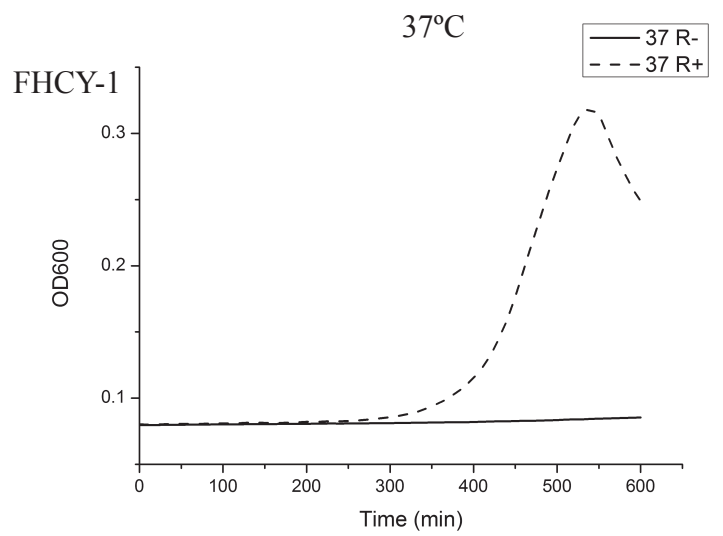

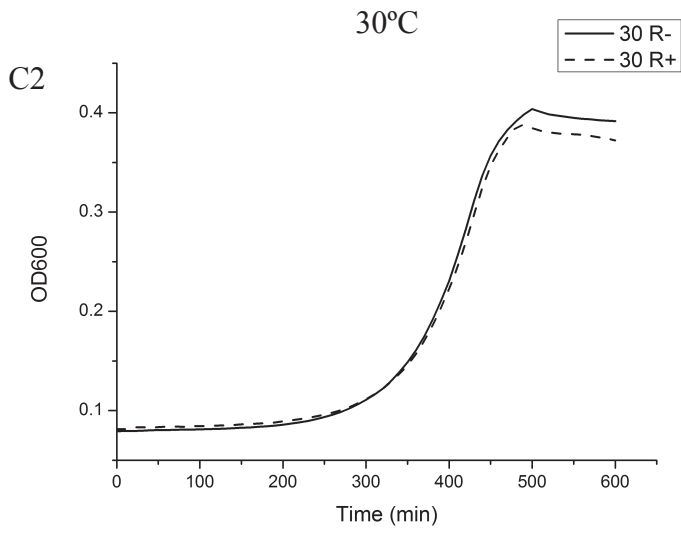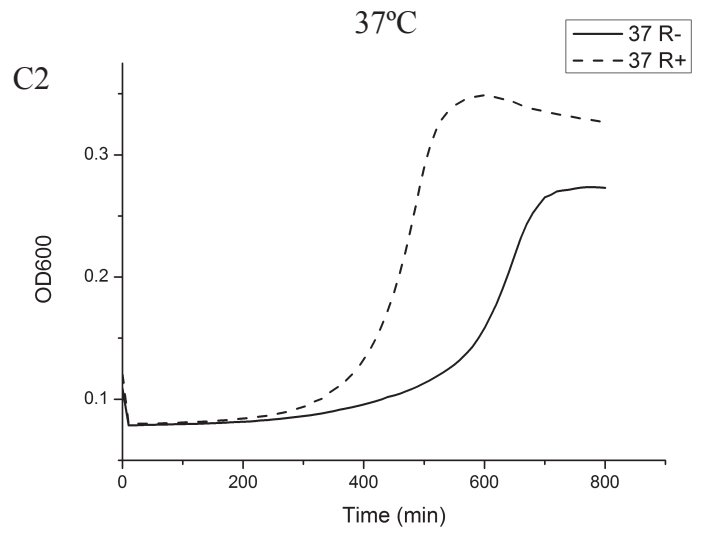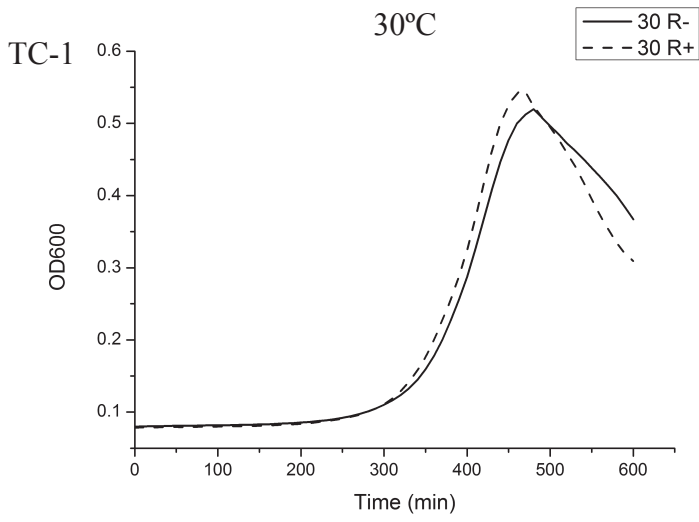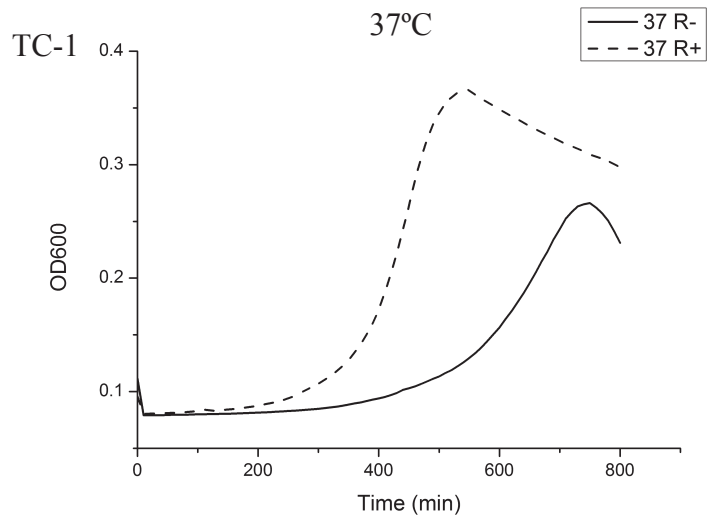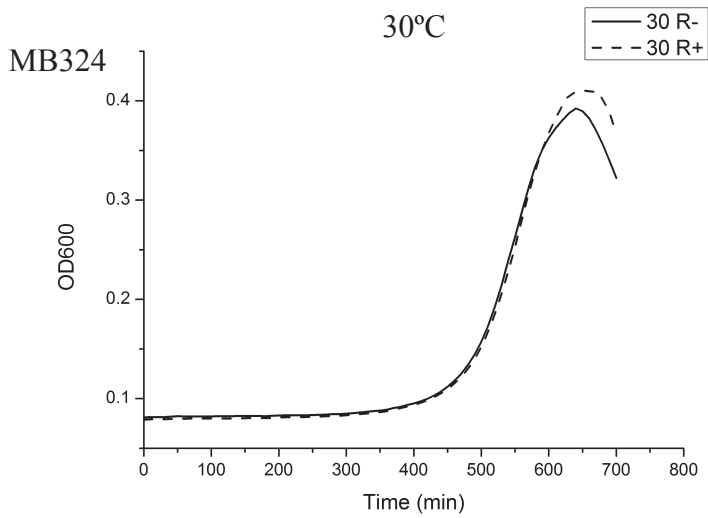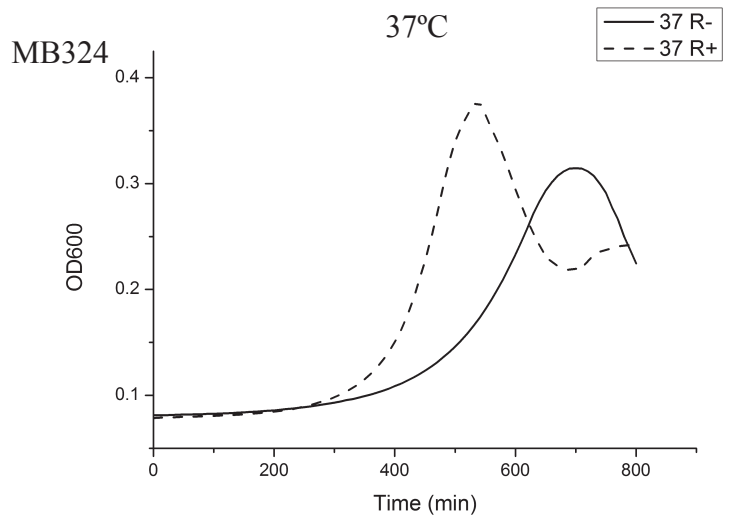

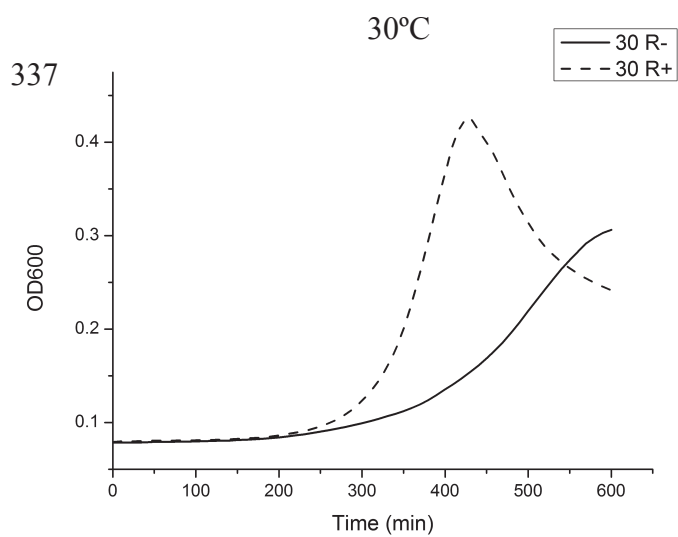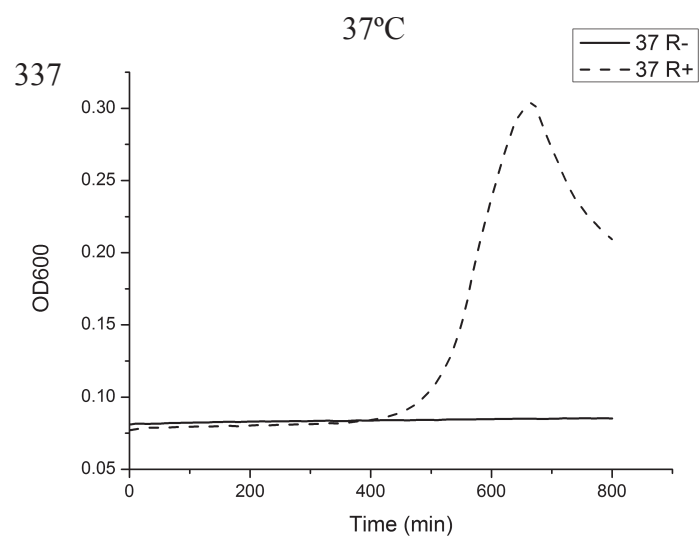

**Figure S1.** Growth profiles for different *L. lactis* strains measured in 96-well microplates. R-: without riboflavin; R+: with riboflavin.
